# Supplementary material for: Potential of novel Mycobacterium tuberculosis infection phase-dependent antigens in the diagnosis of TB disease in a high burden setting
Source: BMC Infect Dis. 2012 Jan 20;12:10. doi: 10.1186/1471-2334-12-10 (PMC3282638; doi:10.1186/1471-2334-12-10)
Supplement: Additional file 7 — Table S7. Sequences of the peptide pools evaluated in the study. [file 1471-2334-12-10-S7.XLS]

## Sheet: Peptide sequences
Supplementary table 7: Sequences of the peptides evaluated in the study
		Sequence
Rv2654 peptide pool	P1	MSGHALAARTLLAAADEL
	P2	AADELVGGPPVEASAAAL
	P3	ASAAALAGDAAGAWRTAA
	P4	AWRTAAVELARALVRAVA
	P5	LVRAVAESHGVAAVLFAA
	P6	VLFAATAAAAAAVDRGDPP
Rv2657 peptide pool	P1	MCAFPSPSLGWTVSHETERP
	P2	WTVSHETERPGMADAPPLSR
	P3	GMADAPPLSRRYITISEAAE
	P4	RYITISEAAEYLAVTDRTVR
	P5	YLAVTDRTVRQMIADGRLRG
	P6	QMIADGRLRGYRSGTRLVRL
	P7	YRSGTRLVRLRRDEVDGAMH
	P8	RRDEVDGAMHPFGGAA
Rv2661c peptide pool	P1	MRARSDAGGQSVKSRTSNRS
	P2	SVKSRTSNRSRSSRRSRVRS
	P3	RSSRRSRVRSSISALVDNPQ
	P4	SISALVDNPQARPRELPVLC
	P5	ARPRELPVLCGWPVVRVEPV
	P6	GWPVVRVEPVCEFVPEPVCG
	P7	CEFVPEPVCGQAEVLGEPAA
	P8	QAEVLGEPAAAHRVTSARRS
	P9	AHRVTSARRSPSTTVCSRSQ
	P10	PSTTVCSRSQKASAVVISSV
	P11	KASAVVISSVSSVARVRRAS
	P12	SSVARVRRASVSSVDATTA
Rv2659 pool A	P1	VTQTGKRQRRKFGRIRQFNS
	P2	KFGRIRQFNSGRWQASYTGP
	P3	GRWQASYTGPDGRVYIAPKT
	P4	DGRVYIAPKTFNAKIDAEAW
	P5	FNAKIDAEAWLTDRRREIDR
	P6	LTDRRREIDRQLWSPASGQE
	P7	QLWSPASGQEDRPGAPFGEY
	P8	DRPGAPFGEYAEGWLKQRGI
	P9	AEGWLKQRGIKDRTRAHYRK
	P10	KDRTRAHYRKLLDNHILATF
	P11	LLDNHILATFADTDLRDITP
	P12	ADTDLRDITPAAVRRWYATT
	P13	AAVRRWYATTAVGTPTMRAH
Rv2659 peptide pool C	P26	GVRDISIPPHLIPAIEDHLH
	P27	LIPAIEDHLHKHVNPGRESL
	P28	KHVNPGRESLLFPSVNDPNR
	P29	LFPSVNDPNRHLAPSALYRM
	P30	HLAPSALYRMFYKARKAAGR
	P31	FYKARKAAGRPDLRVHDLRH
	P32	PDLRVHDLRHSGAVLAASTG
	P33	SGAVLAASTGATLAELMQRL
	P34	ATLAELMQRLGHSTAGAALR
	P35	GHSTAGAALRYQHAAKGRDR
	P36	YQHAAKGRDREIAALLSKLA
	P37	EIAALLSKLAENQEM
Rv3875 (ESAT-6) peptide pool	P1A	MTEQQWNFAGIEAAASAIQG
	P1B	GIEAAASAIQGNVTSI
	P2	SAIQGNVTSIHSLLDEGKQSLTKLA
	P3	EGKQSLTKLAAAWGGSGSEAYQGVQ
	P4	SGSEAYQGVQQKWDATATELNNALQ
	P5	TATELNNALQNLARTISEAGQAMAS
	P6	NLARTISEAGQAMASTEGNVTGMFA
Rv2662 peptide pool	P1	MDDLTRLRRELLDRFDVRDF
	P2	LLDRFDVRDFTDWPPASLRA
	P3	TDWPPASLRALIATYDPWID
	P4	LIATYDPWIDMTASPPQPVS
	P5	MTASPPQPVSPGGPRLRLVR
	P6	PGGPRLRLVRLTTNPSARAA
	P7	LTTNPSARAAPIGNGGDSSV
	P8	PIGNGGDSSVCAGEKQCRPP
Rv2663 peptide pool	P1	VEVRASARKHGINDDAMLHA
	P2	GINDDAMLHAYRNALRYVEL
	P3	YRNALRYVELEYHGEVQLLV
	P4	EYHGEVQLLVIGPDQTGRLL
	P5	IGPDQTGRLLELVIPADEPP
	P6	ELVIPADEPPRIIHANVLRP
	P7	RIIHANVLRPKFYDYLR
Rv0288 (TB10.4) peptide pool	P1	MSQIMYNYPAMLGHAGDM
	P2	MLGHAGDMAGYAGTLQSL
	P3	YAGTLQSLGAEIAVEQAA
	P4	EIAVEQAALQSAWQGDTG
	P5	SAWQGDTGITYQAWQAQW
	P6	YQAWQAQWNQAMEDLVRA
	P7	AMEDLVRAYHAMSSTHEA
	P8	AMSSTHEANTMAMMARDT
	P9	MAMMARDTAEAAKWGG
Rv2659 peptide pool B	P14	AVGTPTMRAHSYSLLRAIMQ
	P14	SYSLLRAIMQTALADDLIDS
	P16	TALADDLIDSNPCRISGAST
	P17	NPCRISGASTARRVHKIRPA
	P18	ARRVHKIRPATLDELETITK
	P19	TLDELETITKAMPDPYQAFV
	P20	AMPDPYQAFVLMAAWLAMRY
	P21	LMAAWLAMRYGELTELRRKD
	P22	GELTELRRKDIDLHGEVARV
	P23	IDLHGEVARVRRAVVRVGEG
	P24	RRAVVRVGEGFKVTTPKSDA
	P25	FKVTTPKSDAGVRDISIPPH
Rv2660 peptide pool	P1	VIAGVDQALAATGQASQRAA
	P2	ATGQASQRAAGASGGVTVGV
	P3	GASGGVTVGVGVGTEQRNLS
	P4	GVGTEQRNLSVVAPSQFTFS
	P5	VVAPSQFTFSSRSPDFVDET
	P6	SRSPDFVDETAGQSWCAILG
	P7	AGQSWCAILGLNQFH
